# Supplementary material
Source: PubMed Central journal article supplement (PMC5278166)
Supplement: IAI.00806-16_zii999091949s1.pdf [file IAI.00806-16_zii999091949s1.pdf]

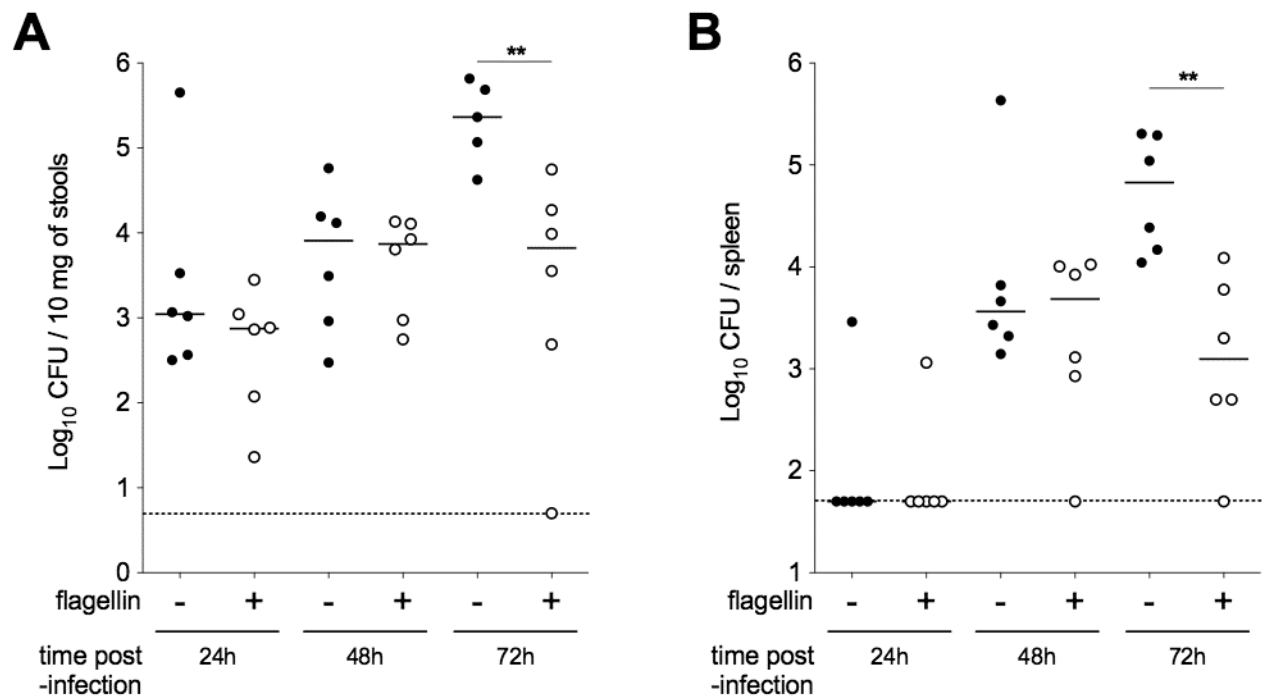

**FIGURE S1: Flagellin treatment is associated with low intestinal colonization and dissemination of *Y. pseudotuberculosis* three days after challenge.** Female C57BL/6 mice were treated intraperitoneally with PBS alone or flagellin (5  $\mu$ g) in PBS 30 min before an intragastric challenge with  $5 \times 10^8$  *Y. pseudotuberculosis*. Bacterial counts were determined in the stools (A) and the spleen (B). CFU counts for individual mice (n=5-6) at 24, 48 and 72 hours post-infection are shown. The solid line corresponds to the median value, and the dashed bar represents the detection threshold. Data from flagellin-treated and untreated mice were compared in a Mann-Whitney test (\*\*  $P < 0.01$ ).

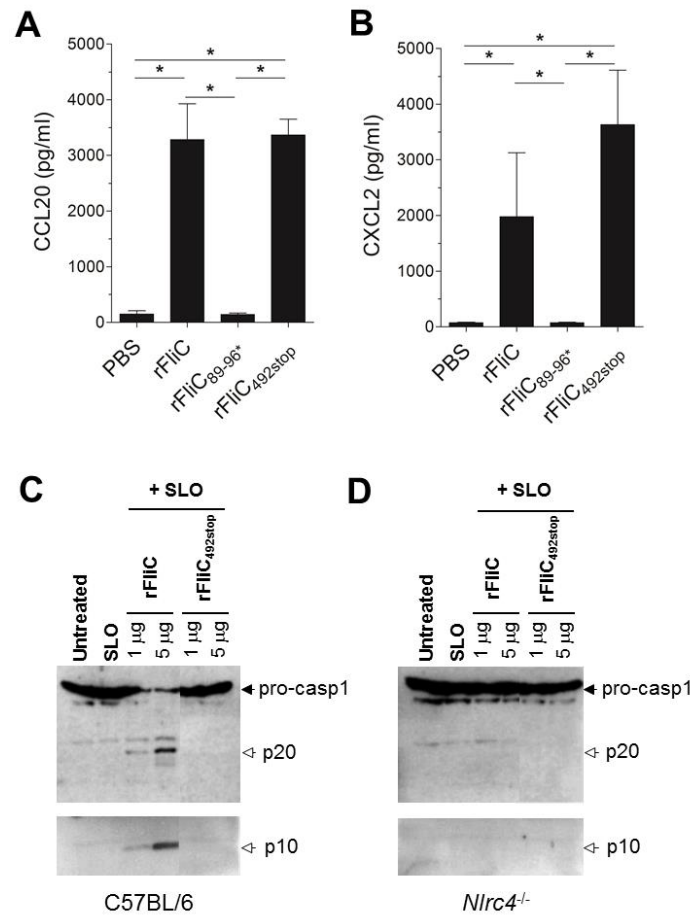

**FIGURE S2: Biological activity of recombinant flagellins.** (A-B) Female C57BL/6 mice (n=3-4) were injected intravenously with 5 µg of flagellin (either histidine-tagged flagellin rFliC, histidine-tagged mutant flagellin rFliC<sub>89/96</sub>\* or histidine-tagged mutant flagellin rFliC<sub>492stop</sub>). Two hours post-injection, the sera were assayed for CCL20 and CXCL2 production (using an ELISA). The data are quoted as the mean ± SD. Intergroup differences were analyzed in a Mann-Whitney test (\*  $P < 0.05$ ). (C-D) Flagellin-specific caspase-1 activation. Bone marrow-derived macrophages from C57BL/6 (C) and *Nlr4*<sup>-/-</sup> (D) mice were left untreated or incubated with streptolysin O (SLO, 25 µg/ml) in the presence or absence of rFliC or rFliC<sub>492stop</sub> (1 or 5 µg/ml). The macrophages were washed extensively and incubated for 2 h. Cell extracts were then prepared and immunoblotted for caspase-1. Arrows indicate procaspase-1 (p45) and its processed subunits (p10 and p20).

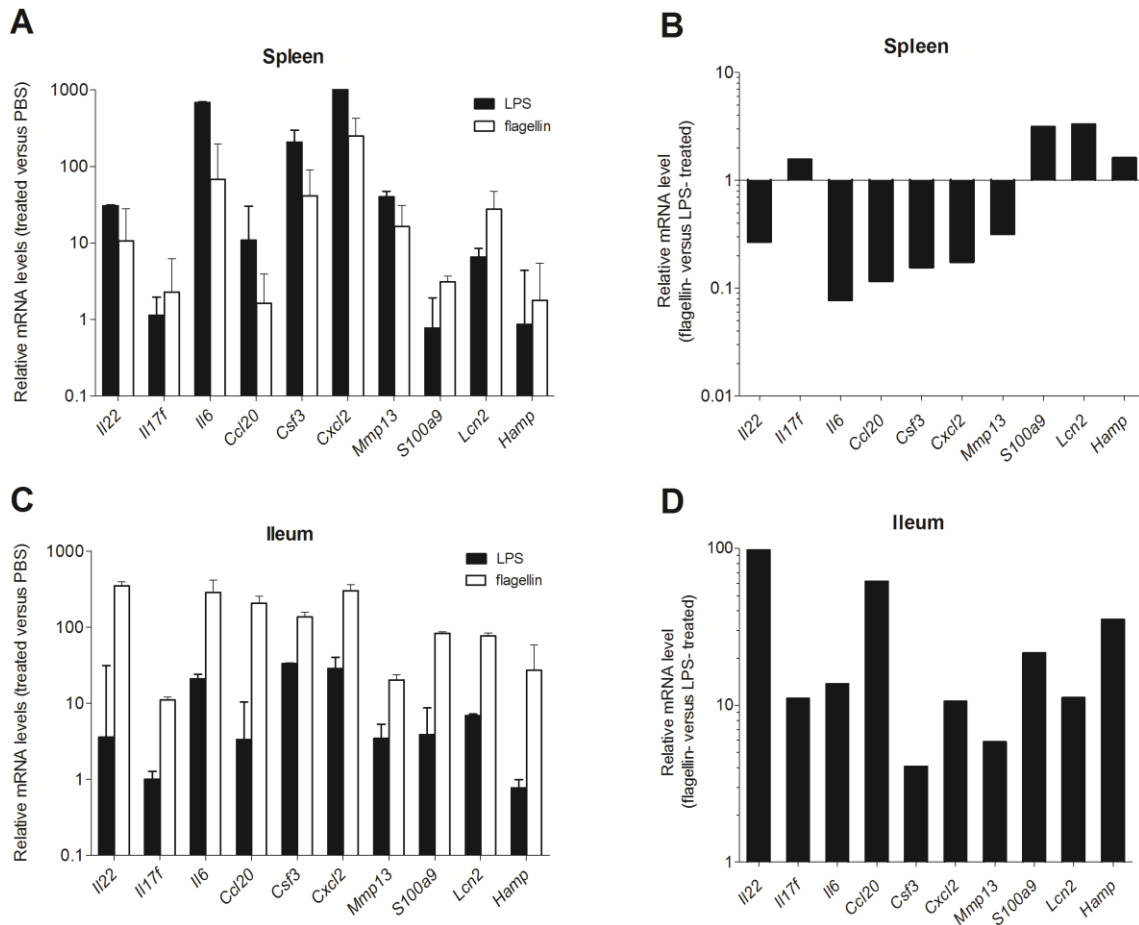

**FIGURE S3: Flagellin (but not LPS) mediates a strong transcriptional response in the intestine.** BALB/c mice were treated i.p. with PBS alone (n=2) or with flagellin (5  $\mu$ g) or LPS (5  $\mu$ g) in PBS (n=4). The transcriptional responses in the spleen (A-B) and the ileum (C-D) were analyzed by TaqMan Low Density Arrays 2 h after treatment. (A-C) mRNA levels are expressed relative to PBS-treated animals and are shown as the mean  $\pm$  SD. (B-D) Expression of the results as the mean of mRNA level in flagellin-treated mice relative to that in LPS-treated animals.

Table S1: List of real time RT-qPCR primers

| Target gene   | forward primer         | reverse primer            |
|---------------|------------------------|---------------------------|
| <i>Actb</i>   | CGTCATCCATGGCGAACTG    | GCTTCTTTGCAGCTCCTTCGT     |
| <i>Cxcl2</i>  | CCCTCAACGGAAGAACCAAA   | CACATCAGGTACGATCCAGGC     |
| <i>Hamp</i>   | GATGGCACTCAGCACTCG     | CTGCAGCTCTGTAGTCTGTCTCA   |
| <i>Il22</i>   | TTTCCTGACCAAACCTCAGCA  | TCTGGATGTTCTGGTCGTCA      |
| <i>Il6</i>    | GTTCTCTGGGAAATCGTGGAAA | AAGTGCATCATCGTTGTTTCATACA |
| <i>Reg3g</i>  | GGCATCTTTCTTGGCAACTT   | ACCATCACCATCATGTCCTG      |
| <i>S100a9</i> | CACCCTGAGCAAGAAGGAAT   | TGTCATTTATGAGGGCTTCATTT   |

Table S2: References of the probes used in the Taqman Low Density Arrays

| Gene Symbol   | Assay ID (Applied Biosystems) |
|---------------|-------------------------------|
| <i>Actb</i>   | Mm00607939_s1                 |
| <i>B2m</i>    | Mm00437762_m1                 |
| <i>Ccl20</i>  | Mm00444228_m1                 |
| <i>Csf3</i>   | Mm00438334_m1                 |
| <i>Cxcl10</i> | Mm99999072_m1                 |
| <i>Cxcl2</i>  | Mm00436450_m1                 |
| <i>Hamp</i>   | Mm00519025_m1                 |
| <i>Il17c</i>  | Mm00521397_m1                 |
| <i>Il17f</i>  | Mm00521423_m1                 |
| <i>Il1b</i>   | Mm01336189_m1                 |
| <i>Il22</i>   | Mm00444241_m1                 |
| <i>Il23a</i>  | Mm00518984_m1                 |
| <i>Il6</i>    | Mm99999064_m1                 |
| <i>Lcn2</i>   | Mm01324470_m1                 |
| <i>Mmp13</i>  | Mm00439491_m1                 |
| <i>Reg3b</i>  | Mm00440616_g1                 |
| <i>Reg3g</i>  | Mm00441127_m1                 |
| <i>S100a9</i> | Mm00656925_m1                 |
